# Supplementary material for: Spatial and temporal variation of anthropogenic black carbon emissions in China for the period 1980–2009
Source: Copernicus journal article supplement (doi:10.5194/acp-12-4825-2012), 2012-06-01
Supplement: Supplementary file 1 [file Supplements.xlsx]

## Sheet: 1985
Province	Industry	Biomass open burning	Power generation and heating	Residential	Transportation	total
Beijing	7.53413	0.0452403	0.123869	9.45823	1.76288	18.9244
Tianjin	2.23844	0.0207854	0.0635763	6.91208	0.796674	10.0316
Hebei	9.35726	0.279313	0.157158	44.7124	2.32628	56.8324
Shanxi	18.171	0.0997147	0.103387	42.5434	1.75918	62.6767
Inner Mongol	4.72835	0.787133	0.113194	19.7417	1.11982	26.4902
Liaoning	18.6664	0.142652	0.237162	24.0725	2.42243	45.5411
Jilin	2.88505	0.228383	0.215721	20.0366	1.24808	24.6138
Heilongjiang	3.03612	1.17195	0.238766	38.7093	1.83838	44.9945
Shanghai	7.26849	0.0279339	0.20264	4.20228	0.845217	12.5466
Jiangsu	4.66816	0.426837	0.0927699	38.3298	1.90683	45.4244
Zhejiang	1.51374	0.227166	0.0391596	24.5202	0.988268	27.2886
Anhui	6.92513	0.313703	0.0308886	31.457	1.28329	40.01
Fujian	0.865448	0.176434	0.00777645	24.5825	0.86041	26.4925
Jiangxi	2.4539	0.136659	0.020668	18.6663	1.08238	22.3599
Shandong	7.64601	0.465341	0.13148	32.5047	2.43308	43.1806
Henan	8.3155	0.328259	0.0956886	51.5097	2.44274	62.6919
Hubei	7.63999	0.217655	0.103079	35.0627	1.83359	44.8571
Hunan	4.80392	0.457659	0.0410816	90.7078	1.58841	97.5989
Guangdong	2.0227	0.350252	0.0711843	74.3655	2.73115	79.5408
Guangxi	1.09103	0.27739	0.0084569	13.7588	1.05512	16.1908
Hainan	0	0.0199373	0	5.86866	0.245484	6.13408
Chongqing	0	0	0	0	0	0
Sichuan	11.0221	0.398209	0.141037	66.9288	3.22848	81.7187
Guizhou	4.62709	0.114051	0.0093663	22.7944	0.818088	28.363
Yunnan	4.97843	0.233453	0.012455	29.4194	1.25334	35.8971
Xizang	0	0.0100076	0	0	0.230516	0.240524
Shannxi	1.80492	0.130594	0.0515782	45.045	1.12853	48.1606
Gansu	2.09964	0.0604842	0.0132073	11.7729	0.874306	14.8205
Qinghai	0.146418	0.00944164	0.00407571	2.76606	0.394699	3.3207
Ningxia	0.356695	0.0156332	0.00314485	3.36201	0.258923	3.99641
Xinjiang	1.47773	0.0932673	0.105232	14.2184	1.23753	17.1322
total	148.344	7.26553	2.4378	848.029	41.9941	1048.07

## Sheet: 1995
Province	Industry	Biomass open burning	Power generation and heating	Residential	Transportation	total
Beijing	13.4109	0.176806	0.263872	11.5252	3.37034	28.7471
Tianjin	3.85447	0.119724	0.0911934	5.3676	2.23892	11.6719
Hebei	39.9096	1.72933	0.307125	47.138	7.81973	96.9038
Shanxi	175.302	0.582259	0.229824	21.5892	3.94225	201.645
Inner Mongol	12.6913	1.45841	0.234517	13.9723	2.76452	31.121
Liaoning	29.8515	0.970781	0.696783	21.2187	5.97899	58.7167
Jilin	4.55468	1.57234	0.332932	22.1441	2.09448	30.6986
Heilongjiang	6.95193	1.66701	0.423543	45.0536	3.85839	57.9545
Shanghai	22.2588	0.141287	0.234074	4.96912	2.41552	30.0188
Jiangsu	9.45087	2.26912	0.346653	42.7153	6.08435	60.8663
Zhejiang	3.06899	0.941625	0.175795	22.2227	3.88135	30.2904
Anhui	11.3605	1.80904	0.0604756	41.2197	3.06572	57.5154
Fujian	1.82587	0.617091	0.0551217	22.8963	2.18877	27.5832
Jiangxi	6.43106	0.484056	0.0446623	25.391	1.91879	34.2695
Shandong	19.2237	2.56084	0.67446	37.5161	7.49859	67.4736
Henan	16.7538	1.98318	0.26582	49.1495	5.30829	73.4606
Hubei	14.9948	0.919735	0.215346	45.2234	3.68679	65.0401
Hunan	9.23308	2.05942	0.174097	53.8521	4.35839	69.6771
Guangdong	3.83175	1.34923	0.319268	44.2858	10.7755	60.5615
Guangxi	3.20954	1.23625	0.0166417	22.0314	2.78104	29.2749
Hainan	0.03727	0.179654	0.00411064	0.00830388	0.831274	1.06061
Chongqing	0	0	0	0	0	0
Sichuan	31.2406	1.69213	0.120927	79.2357	6.71821	119.008
Guizhou	12.0991	0.448143	0.0195348	35.239	1.65104	49.4568
Yunnan	15.2707	0.653956	0.0151204	37.8193	3.65535	57.4145
Xizang	0	0.0419441	0	0	0.429631	0.471575
Shannxi	12.0225	0.545314	0.0811276	21.9811	2.8374	37.4675
Gansu	3.7605	0.321973	0.129198	18.26	1.79534	24.267
Qinghai	0.134772	0.0508213	0.015889	2.82245	0.700036	3.72397
Ningxia	1.92056	0.108804	0.0260921	2.4236	0.631687	5.11075
Xinjiang	4.27341	0.557912	0.0871759	16.9292	2.56779	24.4155
total	488.928	29.2482	5.66138	814.2	107.848	1445.89

## Sheet: 2000
Province	Industry	Biomass open burning	Power plant and Heating	Residential	Transportation	total
Beijing	10.2848	0.128291	0.163	9.10558	4.66454	24.3463
Tianjin	3.05791	0.105631	0.126	4.17855	3.3504	10.8185
Hebei	29.9529	2.34854	0.3654	45.0002	10.3939	88.061
Shanxi	112.914	0.810667	0.1337	15.7172	6.15289	135.729
Inner Mongol	11.0556	1.02604	0.2774	11.574	4.18689	28.1199
Liaoning	20.8962	0.774375	0.7318	27.9039	7.26308	57.5694
Jilin	4.10524	1.26577	0.3488	20.1252	3.92594	29.771
Heilongjiang	4.61103	2.36634	0.4812	21.3425	5.11939	33.9205
Shanghai	19.7542	0.204999	0.1954	3.47177	3.5098	27.1362
Jiangsu	7.61318	3.96002	0.4861	31.4943	7.96605	51.5197
Zhejiang	2.50812	1.33519	0.3205	14.2721	6.16478	24.6007
Anhui	10.9443	3.46303	0.0842	30.6258	5.00382	50.1211
Fujian	1.66807	0.919971	0.0711	4.59786	2.93422	10.1912
Jiangxi	4.98193	0.650267	0.0532	19.1136	3.17999	27.979
Shandong	10.6723	3.66363	0.4924	39.5819	10.1068	64.517
Henan	11.6731	3.4759	0.3118	42.6514	8.93068	67.0429
Hubei	11.8729	1.15925	0.1898	44.6934	5.17075	63.0861
Hunan	5.98732	3.64273	0.1353	34.255	5.55864	49.5789
Guangdong	2.88367	2.36327	0.4172	19.3782	15.4565	40.4989
Guangxi	2.32442	2.48685	0.0358	24.657	3.18723	32.6913
Hainan	0.0444933	0.291694	0.0121	10.0323	0.899377	11.28
Chongqing	1.93757	0.523673	0.0254	15.1022	2.1759	19.7648
Sichuan	9.98	1.67736	0.1209	38.5302	6.59132	56.8997
Guizhou	12.93	0.69044	0.0445	39.2495	2.33386	55.2484
Yunnan	10.7529	0.955724	0.0345	25.9229	6.0179	43.684
Xizang	0	0.0655789	0	0	0.64586	0.711439
Shannxi	4.68649	0.9451	0.1013	17.3422	3.62509	26.7001
Gansu	3.52836	0.610601	0.1839	17.3046	2.53239	24.1599
Qinghai	0.121198	0.0645095	0.0164	3.88971	1.03087	5.12268
Ningxia	0.784182	0.206339	0.0246	2.6995	1.02163	4.73625
Xinjiang	2.88315	1.01017	0.1385	13.6473	4.0387	21.7178
total	337.41	43.192	6.1222	647.46	153.139	1187.32

## Sheet: 2001
Province	Industry	Biomass open burning	Power plant and Heating	Residential	Transportation	total
Beijing	10.1869	0.114157	0.15596	9.08791	4.96722	24.5121
Tianjin	5.19165	0.168238	0.228583	3.88712	2.65923	12.1348
Hebei	30.6045	2.56617	0.380797	49.537	10.8372	93.9257
Shanxi	114.549	0.702427	0.136514	23.1051	6.37437	144.868
Inner Mongol	9.13864	1.5428	0.300714	9.26054	4.2929	24.5356
Liaoning	21.5941	1.544	0.709662	27.2002	7.45143	58.4995
Jilin	3.65131	2.34157	0.384631	17.9372	4.09692	28.4116
Heilongjiang	4.53028	2.84216	0.465757	22.9537	4.91343	35.7054
Shanghai	18.9817	0.160763	0.187425	2.96221	3.82448	26.1165
Jiangsu	7.35816	3.22437	0.50277	32.179	8.32973	51.5941
Zhejiang	2.57286	1.08036	0.398332	14.0282	7.06256	25.1423
Anhui	11.2727	2.85501	0.136476	28.0515	5.26473	47.5805
Fujian	1.66388	0.7825	0.0794935	36.2122	3.08982	41.8279
Jiangxi	4.58338	0.723702	0.0486825	16.2452	3.21784	24.8188
Shandong	12.9401	3.97626	0.697242	41.696	10.4664	69.776
Henan	12.4001	3.77604	0.329984	29.2768	9.01892	54.8018
Hubei	11.5507	1.43074	0.176861	43.4586	5.24075	61.8577
Hunan	6.45193	3.05562	0.147401	39.1532	4.97306	53.7812
Guangdong	2.89543	1.79062	0.447797	23.1007	15.9845	44.219
Guangxi	2.49137	1.90129	0.0319264	21.0594	3.11677	28.6008
Hainan	0.0449253	0.226744	0.00801838	9.19772	0.487341	9.96475
Chongqing	3.19835	0.64144	0.0168976	19.1816	2.23998	25.2783
Sichuan	10.512	1.86772	0.120716	54.0952	6.79609	73.3916
Guizhou	11.4836	0.89132	0.050673	40.0844	2.45095	54.961
Yunnan	11.5804	1.31094	0.0450736	24.3752	6.48355	43.7951
Xizang	0	0.0704332	0	0	0.699976	0.770409
Shannxi	5.46195	0.891034	0.0920334	16.6554	3.1668	26.2672
Gansu	3.65867	0.650011	0.178085	17.7068	2.5421	24.7357
Qinghai	0.119973	0.0824009	0.0176943	3.74673	0.930428	4.89722
Ningxia	0.78709	0.240402	0.0245618	2.6995	0.986401	4.73796
Xinjiang	3.72865	1.06489	0.147975	15.9607	4.19717	25.0994
total	345.185	44.5161	6.64874	694.095	156.163	1246.61

## Sheet: 2002
Province	Industry	Biomass open burning	Power plant and Heating	Residential	Transportation	total
Beijing	8.55875	0.127086	0.187147	7.43155	4.30386	20.6084
Tianjin	4.90805	0.168199	0.293217	3.57958	2.15425	11.1033
Hebei	31.0338	2.69089	0.417508	48.8716	9.54635	92.5601
Shanxi	142.832	1.04086	0.212817	23.5452	5.94651	173.577
Inner Mongol	11.9451	2.1157	0.348766	12.2541	3.89105	30.5547
Liaoning	21.4446	1.75154	0.754196	27.048	7.79068	58.789
Jilin	3.65065	2.88423	0.377107	18.5957	3.56707	29.0747
Heilongjiang	5.01894	3.08223	0.418478	23.3758	4.80052	36.696
Shanghai	16.499	0.145071	0.211573	2.56189	3.35786	22.7754
Jiangsu	9.32541	3.34771	0.519022	26.6121	6.09234	45.8966
Zhejiang	2.67918	1.01376	0.465838	14.5337	5.50997	24.2025
Anhui	10.6323	3.29196	0.145861	32.7136	3.91914	50.7028
Fujian	1.72407	0.814038	0.087804	35.7265	2.42655	40.7789
Jiangxi	4.89034	0.725013	0.0464525	19.534	3.59716	28.7929
Shandong	10.4552	3.72437	0.725735	40.3543	8.44641	63.706
Henan	11.8063	4.1778	0.366803	41.219	8.94093	66.5108
Hubei	10.8925	1.40784	0.187801	45.0674	4.08396	61.6395
Hunan	5.88459	2.96951	0.140626	33.5128	4.74531	47.2529
Guangdong	2.83296	1.75166	0.512348	24.328	17.5145	46.9394
Guangxi	2.49361	2.03471	0.0349155	20.9864	2.73173	28.2814
Hainan	0.0449253	0.235961	0.00533808	6.42254	1.0989	7.80767
Chongqing	4.06337	0.735054	0.02618	23.5126	2.50439	30.8416
Sichuan	11.5093	2.17981	0.125741	88.6127	4.94495	107.373
Guizhou	11.0605	0.973877	0.0413417	53.4415	1.50912	67.0263
Yunnan	13.0283	1.30799	0.021616	29.7539	4.57205	48.6838
Xizang	0	0.0693263	0	0	0.864392	0.933718
Shannxi	5.99354	0.995736	0.096311	21.2586	3.18988	31.534
Gansu	3.64574	0.727475	0.12599	18.1714	1.80388	24.4745
Qinghai	0.109317	0.0824685	0.0176226	3.65901	0.603723	4.47214
Ningxia	0.747729	0.285803	0.0245618	3.92996	0.635033	5.62309
Xinjiang	3.20514	1.24275	0.184415	17.4368	4.95147	27.0206
total	372.915	48.1004	7.12313	768.05	140.044	1336.23

## Sheet: 2003
Province	Industry	Biomass open burning	Power plant and Heating	Residential	Transportation	total
Beijing	9.19966	0.181683	0.196811	8.39512	3.26892	21.2422
Tianjin	5.02013	0.177265	0.282807	3.49991	2.37589	11.356
Hebei	33.3745	2.81284	0.474444	53.2154	8.25345	98.1307
Shanxi	168.905	1.09224	0.238986	26.1102	4.25646	200.603
Inner Mongol	17.9926	4.51457	0.362677	16.6027	3.93634	43.4089
Liaoning	23.4519	1.86088	0.778373	27.3918	7.62311	61.1061
Jilin	4.27076	3.04227	0.440629	19.2643	3.22657	30.2445
Heilongjiang	10.1458	11.2132	0.469193	24.5728	4.62669	51.0277
Shanghai	19.5691	0.153074	0.233359	2.0038	2.94506	24.9044
Jiangsu	11.6062	3.54281	0.554029	25.6011	5.91891	47.2231
Zhejiang	2.6125	1.0918	0.553155	8.74242	4.84326	17.8431
Anhui	11.5214	3.46498	0.154474	30.6584	4.29434	50.0936
Fujian	0.752347	0.854046	0.237827	40.8379	2.26274	44.9448
Jiangxi	5.88519	0.814512	0.0579067	18.6401	3.29252	28.6902
Shandong	13.9395	3.92378	0.674511	38.9093	7.94159	65.3887
Henan	14.1248	4.35909	0.377539	38.907	8.14565	65.9141
Hubei	12.2926	1.48502	0.179067	42.4334	4.01399	60.4041
Hunan	7.4571	3.14787	0.143633	30.1868	4.28794	45.2233
Guangdong	3.49994	1.84649	0.482218	24.4897	13.5756	43.8939
Guangxi	3.15901	2.16995	0.0342289	22.7916	2.53115	30.6859
Hainan	0.0449253	0.252735	0.00368958	5.78917	1.0982	7.18872
Chongqing	4.44316	0.779787	0.0287538	21.8321	2.38377	29.4676
Sichuan	13.6545	2.31281	0.134473	94.8063	4.82653	115.735
Guizhou	13.0265	1.02813	0.0534268	57.7419	1.38789	73.2379
Yunnan	16.8641	1.4228	0.0253943	30.2366	3.93113	52.48
Xizang	0	0.0730684	0	0	0.689641	0.762709
Shannxi	7.94721	1.04365	0.119583	19.9853	2.77438	31.8701
Gansu	3.89465	0.787698	0.172349	18.0881	1.68259	24.6254
Qinghai	0.109317	0.0853383	0.0208382	3.54972	0.640354	4.40557
Ningxia	1.34144	0.303445	0.0492152	4.4915	0.825497	7.01109
Xinjiang	3.49477	1.29472	0.244446	19.8963	3.59397	28.5242
total	443.6	61.1326	7.77804	779.671	125.454	1417.64

## Sheet: 2004
Province	Industry	Biomass open burning	Power plant and Heating	Residential	Transportation	total
Beijing	7.09583	0.10622	0.289099	7.73578	4.70401	19.9309
Tianjin	6.2914	0.195211	0.372564	3.50459	2.37165	12.7354
Hebei	37.1353	3.38475	0.543342	48.0404	9.60638	98.7102
Shanxi	118.754	1.54434	0.318418	23.4362	5.02586	149.079
Inner Mongol	17.0778	2.41978	0.41964	38.9577	5.21863	64.0935
Liaoning	20.1611	2.45433	0.965849	29.6911	8.61187	61.8842
Jilin	4.78325	3.87569	0.491228	19.3897	3.57293	32.1128
Heilongjiang	15.8808	5.11783	0.490955	25.8285	4.63147	51.9496
Shanghai	14.2834	0.138216	0.232931	2.31245	3.79977	20.7668
Jiangsu	10.7525	4.03238	0.664332	30.6159	7.61513	53.6802
Zhejiang	2.78569	1.05468	0.761058	7.92739	6.32578	18.8546
Anhui	9.90974	4.01184	0.184705	31.4503	4.44993	50.0066
Fujian	1.89299	1.03602	0.120347	46.6524	2.82611	52.5279
Jiangxi	5.97308	0.858108	0.0747845	17.9633	3.72151	28.5908
Shandong	19.6905	4.86377	0.828141	37.0435	10.3007	72.7265
Henan	18.2296	4.70961	0.465673	42.2454	8.75178	74.4021
Hubei	10.7444	1.99768	0.246359	38.0321	4.5224	55.543
Hunan	7.91104	3.65407	0.153132	31.2918	4.96	47.97
Guangdong	3.45163	1.96199	0.640434	24.6941	16.4637	47.2118
Guangxi	3.60111	2.25457	0.0490978	23.5448	3.36237	32.8119
Hainan	0.0449253	0.272148	0.00327781	4.18387	1.11765	5.62187
Chongqing	3.96038	0.978327	0.0521839	20.5334	1.85273	27.377
Sichuan	15.18	2.65338	0.143813	93.6339	5.67737	117.288
Guizhou	9.57151	1.15714	0.0568489	60.234	1.52934	72.5489
Yunnan	8.05833	1.50226	0.029189	28.9258	5.19155	43.7071
Xizang	0	0.0806895	0	0	1.06072	1.14141
Shannxi	7.98841	1.24327	0.134749	16.5827	3.2968	29.2459
Gansu	3.43395	0.92598	0.197129	16.5968	1.25987	22.4138
Qinghai	0.131752	0.103296	0.0129969	3.37883	0.682929	4.30981
Ningxia	2.26575	0.353894	0.0473268	4.61046	0.854778	8.13221
Xinjiang	3.43684	1.50629	0.2805	23.6619	3.94022	32.8257
total	390.477	60.4477	9.2701	802.699	147.306	1410.2

## Sheet: 2005
Province	Industry	Biomass open burning	Power plant and Heating	Residential	Transportation	total
Beijing	7.30479	0.160533	0.238643	7.50095	4.69606	19.901
Tianjin	6.84818	0.226555	0.33711	3.1422	2.46661	13.0207
Hebei	57.6877	3.92945	0.579295	47.6421	7.98563	117.824
Shanxi	168.251	1.65376	0.315378	21.7549	5.89573	197.871
Inner Mongol	25.2285	3.04545	0.499127	32.9867	4.97915	66.7389
Liaoning	30.1502	2.84288	1.02431	29.4339	8.72485	72.1761
Jilin	5.85225	4.43001	0.647346	20.5007	3.67997	35.1103
Heilongjiang	12.5688	4.46939	0.583249	26.8431	5.12179	49.5864
Shanghai	17.6716	0.152805	0.226491	1.88848	3.77201	23.7114
Jiangsu	19.0145	4.25583	0.687121	32.3339	7.50017	63.7916
Zhejiang	3.14332	1.18527	0.813176	6.97265	6.89389	19.0083
Anhui	13.2601	4.0816	0.167372	28.9488	4.87021	51.3281
Fujian	2.98542	0.969583	0.111305	11.0565	2.78864	17.9114
Jiangxi	5.52896	1.05629	0.0749873	17.3119	3.91585	27.888
Shandong	35.9894	6.02729	1.2285	43.6931	10.4948	97.4332
Henan	32.2574	5.94381	0.393824	53.3143	8.45368	100.363
Hubei	16.0322	2.0286	0.191728	37.0353	4.62348	59.9113
Hunan	12.385	4.08722	0.173083	33.5281	4.78336	54.9567
Guangdong	4.66602	2.08217	0.551905	25.1094	18.8554	51.2648
Guangxi	5.52315	2.66985	0.0798578	50.6784	3.41793	62.3692
Hainan	0.0449253	0.250474	0.00401431	3.71443	1.1037	5.11755
Chongqing	5.87981	1.09181	0.0732435	28.1109	2.68447	37.8403
Sichuan	16.4482	3.11795	0.115105	75.434	5.66722	100.782
Guizhou	9.94279	1.34525	0.064167	60.7368	2.66225	74.7512
Yunnan	25.3896	1.798	0.0517724	27.3017	5.71546	60.2566
Xizang	0	0.0859196	0	0	0.936792	1.02271
Shannxi	8.30695	1.48697	0.113102	22.218	2.80775	34.9328
Gansu	6.18216	1.07172	0.17192	17.0358	2.24643	26.708
Qinghai	0.157652	0.124897	0.0130998	3.39613	0.784741	4.47652
Ningxia	3.16192	0.401968	0.0485899	5.41077	0.969624	9.99287
Xinjiang	6.34711	1.79455	0.314747	19.9818	3.98809	32.4263
total	564.21	67.8679	9.89358	795.016	153.486	1590.47

## Sheet: 2006
Province	Industry	Biomass open burning	Power plant and Heating	Residential	Transportation	total
Beijing	4.98128	0.207318	0.25736	9.93731	4.78525	20.1685
Tianjin	6.63586	0.270649	0.341569	2.91869	2.63615	12.8029
Hebei	59.5081	4.61432	0.517078	43.7621	8.45155	116.853
Shanxi	172.85	1.99249	0.329075	25.3505	5.81915	206.342
Inner Mongol	22.9751	4.608	0.597913	20.4818	6.45711	55.1199
Liaoning	29.9721	3.15202	1.08479	30.0098	9.89376	74.1125
Jilin	5.1588	5.33405	0.513916	19.8974	3.69928	34.6034
Heilongjiang	11.5427	14.0184	0.078648	28.3652	5.18354	59.1885
Shanghai	15.2364	0.173743	0.201827	1.73346	3.6575	21.003
Jiangsu	19.8091	5.0411	0.717056	19.5406	8.11387	53.2217
Zhejiang	3.78157	1.37656	0.907282	6.81744	7.54547	20.4283
Anhui	9.68372	4.92001	0.176007	30.8544	5.43655	51.0707
Fujian	2.77364	1.01003	0.114194	10.5476	3.36076	17.8062
Jiangxi	7.53141	1.15804	0.0720715	23.782	4.21202	36.7556
Shandong	46.076	6.90142	1.52843	45.3771	11.4003	111.283
Henan	35.5904	7.28559	0.448676	61.9865	9.17966	114.491
Hubei	15.4749	2.26011	0.183661	40.7005	4.79152	63.4108
Hunan	10.5906	4.49065	0.158141	30.6508	5.36515	51.2554
Guangdong	4.70961	2.27576	0.494581	29.8282	18.2938	55.602
Guangxi	5.78504	2.93027	0.0864391	49.7955	3.41766	62.015
Hainan	0.0449253	0.312028	0.00787869	3.37227	1.13493	4.87203
Chongqing	5.75659	1.00689	0.0597084	36.8439	2.99633	46.6634
Sichuan	16.2991	3.023	0.1303	70.5697	5.89463	95.9167
Guizhou	10.8051	1.47208	0.112878	57.9873	2.64283	73.0202
Yunnan	23.3421	2.04308	0.0452247	24.4715	5.88182	55.7838
Xizang	0	0.0951995	0	0.4972	1.04284	1.63524
Shannxi	21.191	1.66515	0.126219	25.5732	2.95378	51.5093
Gansu	6.23772	1.12743	0.189593	18.7959	2.29321	28.6438
Qinghai	0.787972	0.124255	0.0128005	3.42736	0.814019	5.1664
Ningxia	1.95132	0.452793	0.0648935	3.95665	0.941943	7.3676
Xinjiang	7.12393	2.11877	0.328416	15.7247	4.51142	29.8073
total	584.206	87.4612	9.88662	793.557	162.808	1637.92

## Sheet: 2007
Province	Industry	Biomass open burning	Power plant and Heating	Residential	Transportation	total
Beijing	3.3475	0.235291	0.27369	7.91581	4.87755	16.6498
Tianjin	5.86242	0.319396	0.329042	5.85016	2.84194	15.203
Hebei	70.1141	5.65352	0.606584	42.1046	10.8368	129.316
Shanxi	171.509	2.16055	0.372404	22.6673	6.41046	203.12
Inner Mongol	26.675	3.99465	0.676239	20.4599	7.29167	59.0974
Liaoning	30.5862	3.71417	1.12347	31.818	9.00003	76.2418
Jilin	6.16626	5.44178	0.514663	21.0419	4.30767	37.4723
Heilongjiang	13.8971	5.62514	0.577039	27.4064	6.22968	53.7354
Shanghai	14.5982	0.189398	0.20734	2.40784	3.64357	21.0464
Jiangsu	21.955	5.70618	0.761989	21.075	9.00593	58.5041
Zhejiang	3.86067	1.28374	1.01038	6.50051	8.14056	20.7959
Anhui	12.4993	5.52216	0.164877	35.5324	6.18228	59.9009
Fujian	2.72497	1.07145	0.12326	12.5967	3.78242	20.2988
Jiangxi	8.11308	1.41902	0.105399	12.674	4.80769	27.1192
Shandong	56.7219	7.99601	1.80829	44.6572	12.5631	123.746
Henan	39.8751	8.77378	0.503248	53.4506	10.5058	113.109
Hubei	16.1907	2.54209	0.195917	40.4923	5.53733	64.9584
Hunan	11.1003	5.07438	0.173167	26.1103	6.22471	48.6828
Guangdong	4.29333	2.43475	0.445727	28.5537	18.9883	54.7158
Guangxi	5.5598	3.35278	0.105903	44.1281	3.74906	56.8956
Hainan	0.0449253	0.349214	0.00539585	3.16806	1.18441	4.75201
Chongqing	5.43965	1.30814	0.0744446	16.8283	3.05379	26.7043
Sichuan	17.2775	3.72743	0.123426	65.203	7.42014	93.7516
Guizhou	16.4051	1.66682	0.169921	49.4704	2.96869	70.6809
Yunnan	20.0529	2.28394	0.0841605	27.1699	6.28822	55.8791
Xizang	0	0.112885	0	0.497201	1.30547	1.91556
Shannxi	24.3799	1.97652	0.142843	20.851	3.35073	50.7011
Gansu	7.16973	1.33293	0.207045	19.6133	2.4463	30.7693
Qinghai	1.57879	0.162199	0.0121374	3.43642	0.994291	6.18384
Ningxia	5.11878	0.568727	0.0757683	3.65607	1.03354	10.4529
Xinjiang	8.3437	2.70472	0.360241	15.3453	4.91612	31.6701
total	631.461	88.7037	11.334	732.682	179.888	1644.07

[truncated: 2 more sheets: 2008, 2009]
